# Supplementary material for: Dihydropyridine C-glycoconjugates by organocatalytic Hantzsch cyclocondensation. Stereoselective synthesis of α-threofuranose C-nucleoside enantiomers
Source: Royal Society of Chemistry journal article supplement (doi:10.1039/b900422j), 2009-01-01

**Dihydropyridine C-glycoconjugates by Organocatalytic Hantzsch  
Cyclocondensation. Stereoselective Synthesis of  
 $\alpha$ -Threofuranose C-Nucleoside Enantiomers**

Diogo R. B. Ducatti<sup>‡</sup>, Alessandro Massi<sup>\*†</sup>, Miguel D. Nosedá<sup>‡</sup>,

Maria Eugênia R. Duarte<sup>‡</sup> and Alessandro Dondoni<sup>\*†</sup>

<sup>†</sup>*Dipartimento di Chimica, Laboratorio di Chimica Organica, Università di Ferrara, Via L. Borsari  
46, 44100 Ferrara, Italy and* <sup>‡</sup>*Departamento de Bioquímica e Biologia Molecular, Universidade  
Federal do Paraná, Centro Politécnico, CEP 81-531-990, PO Box 19046, Curitiba, Brazil.*

[adn@unife.it](mailto:adn@unife.it); [msslsn@unife.it](mailto:msslsn@unife.it)

**Supporting Information**

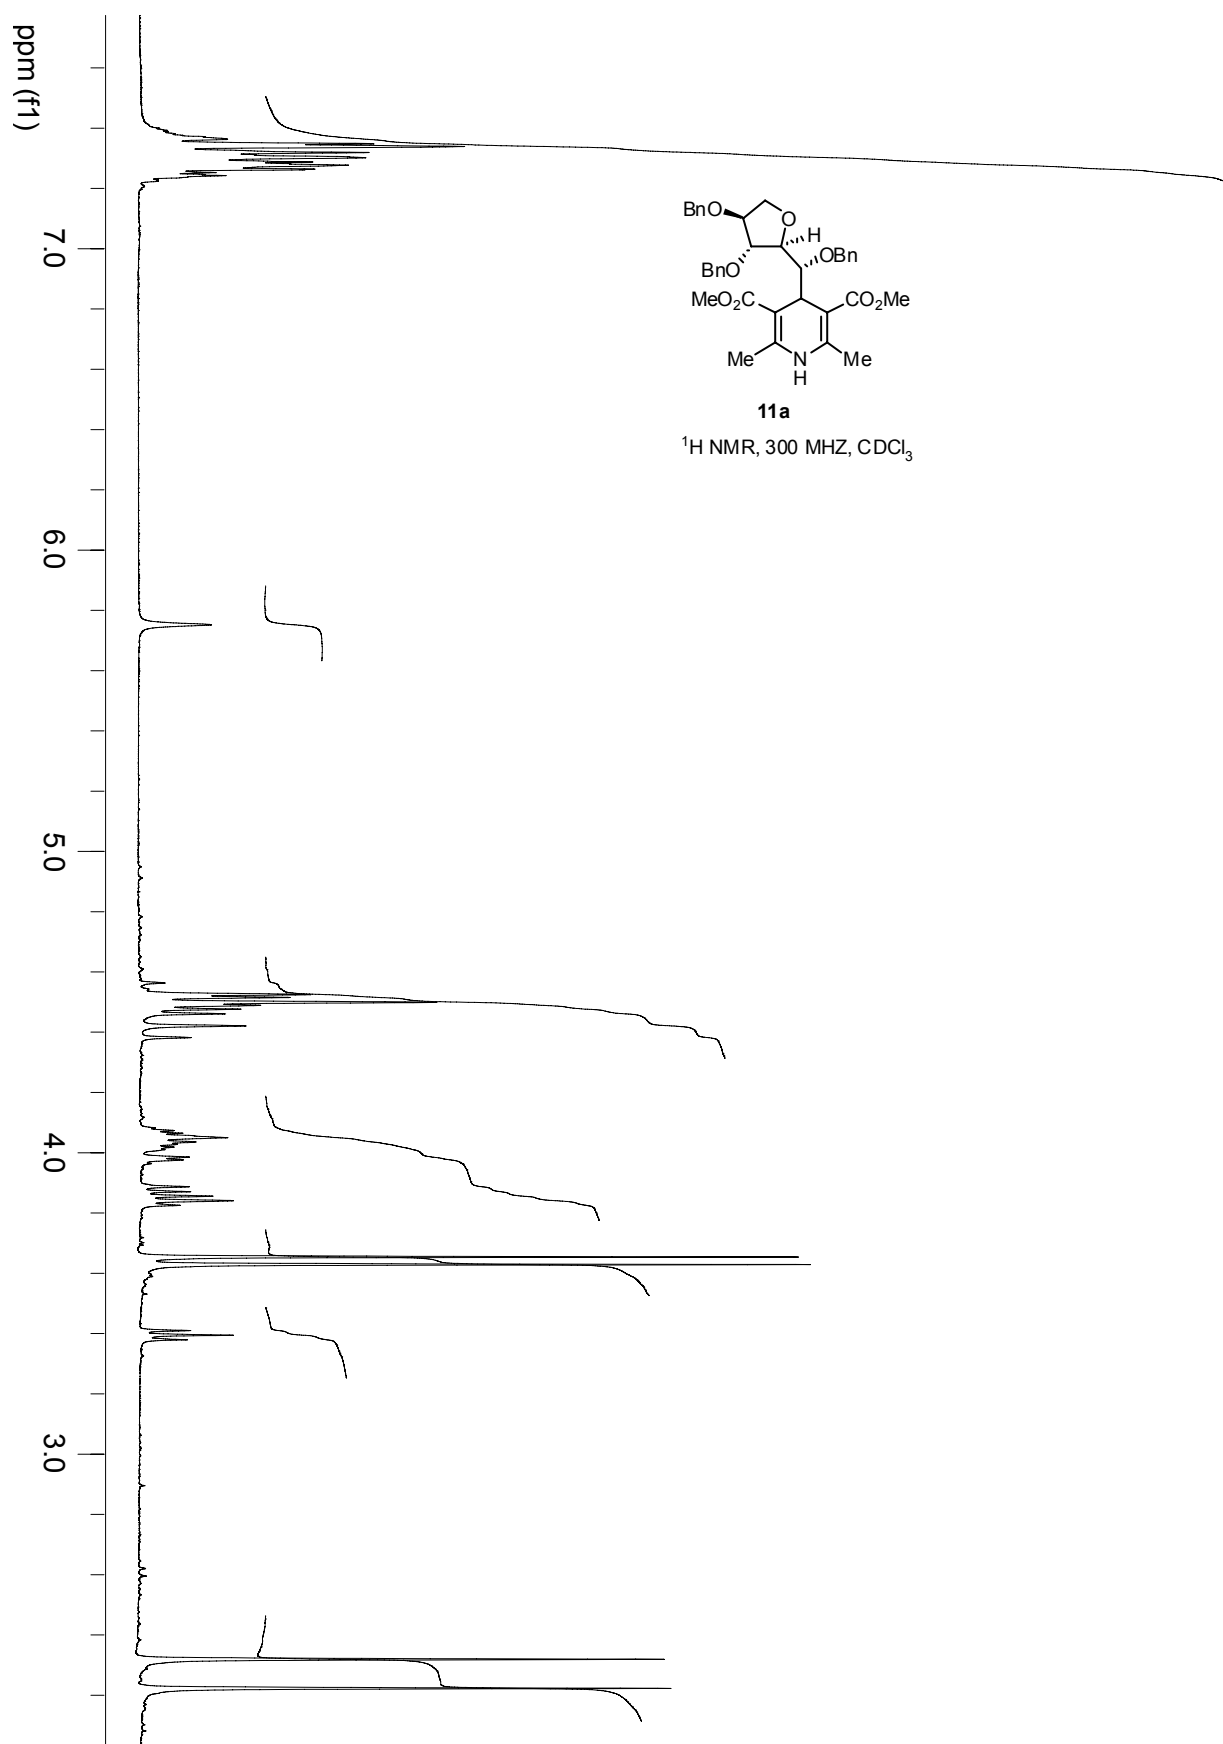

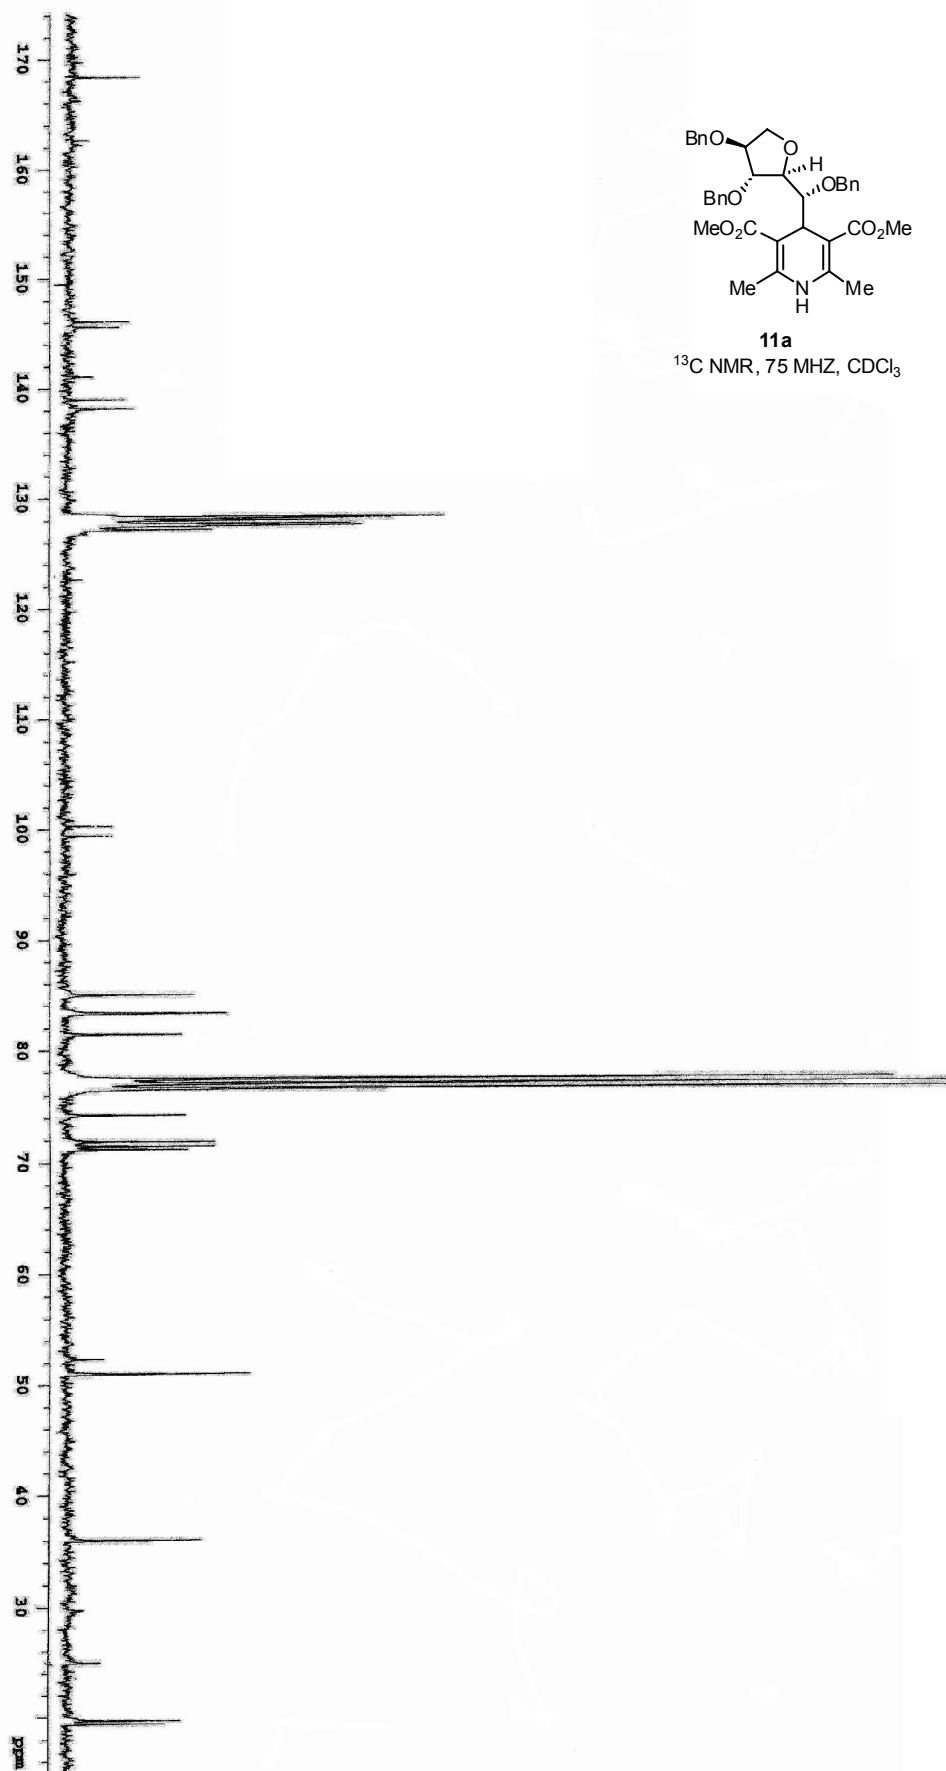

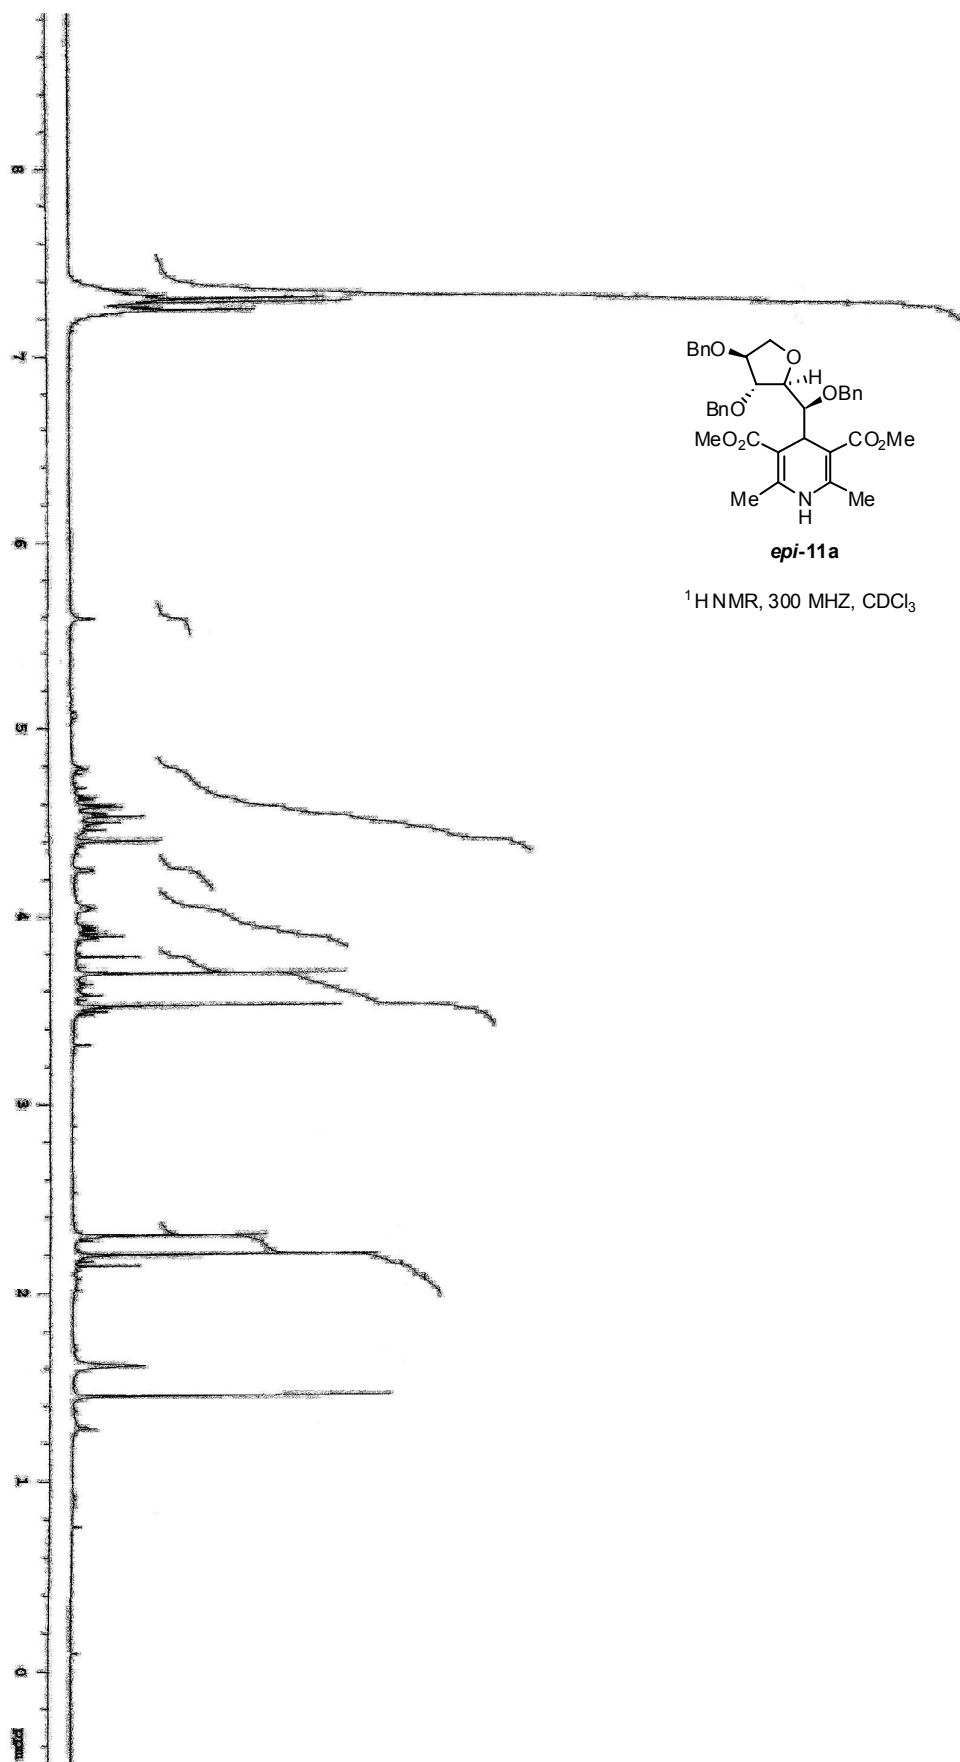

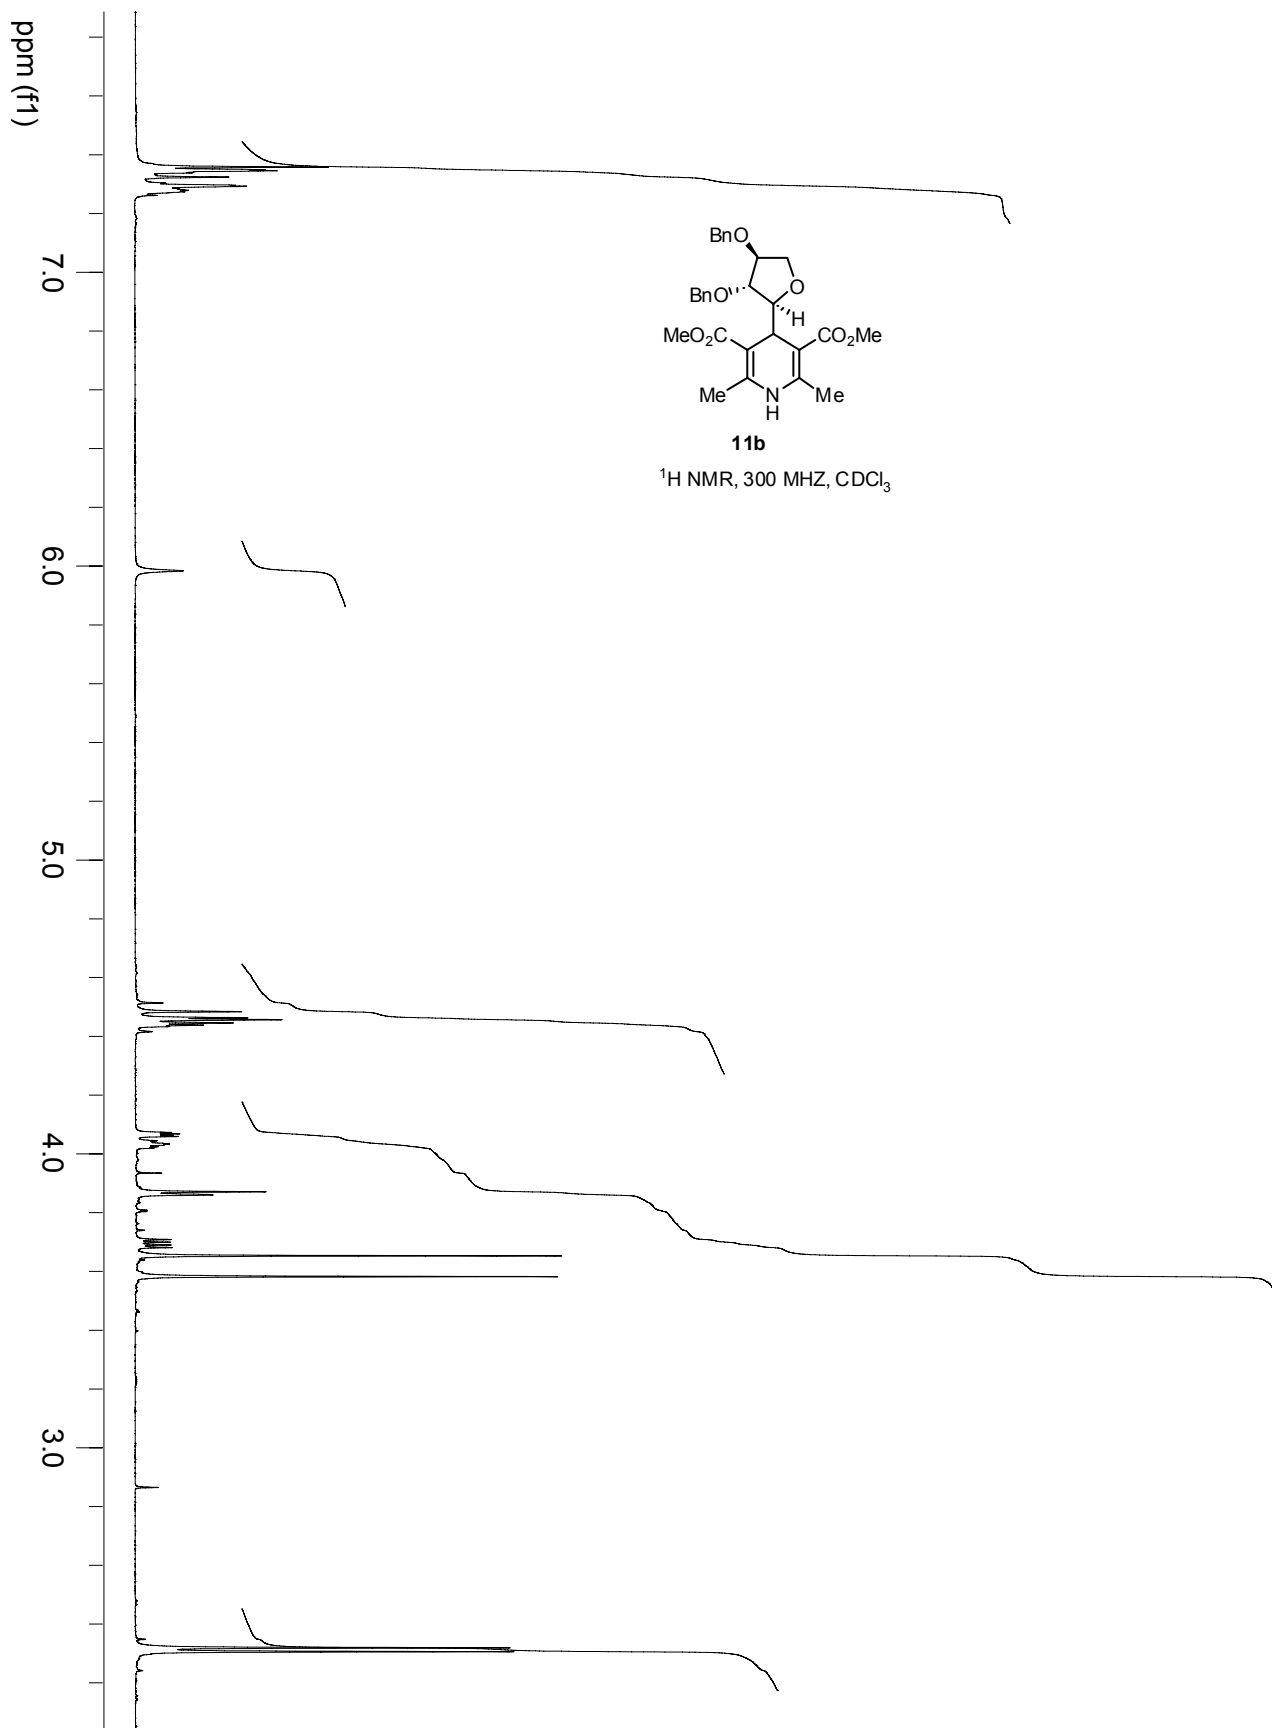

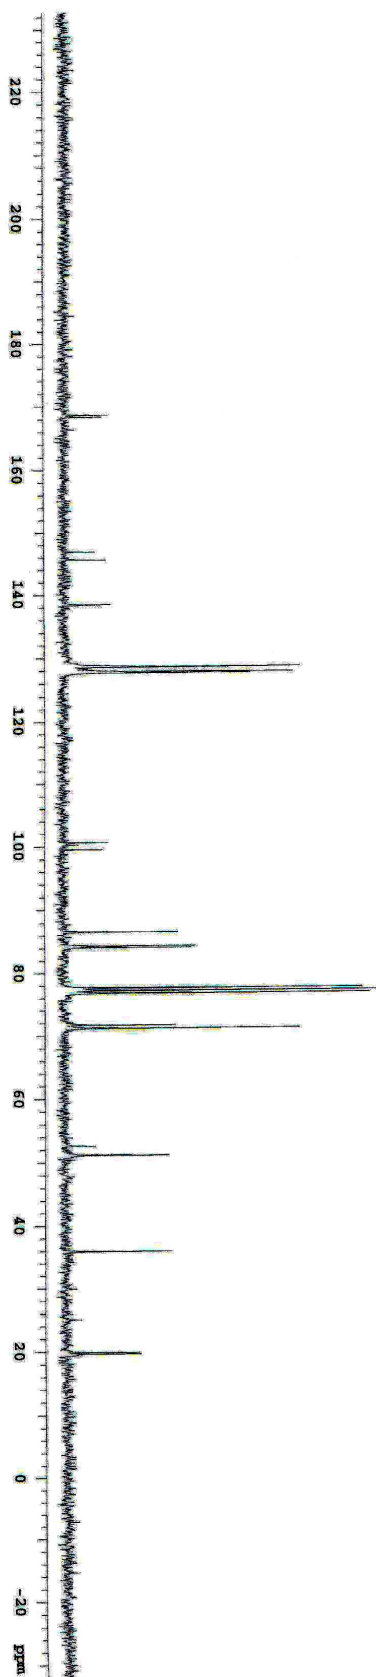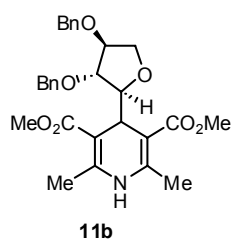

$^{13}\text{C}$  NMR, 75 MHz,  $\text{CDCl}_3$



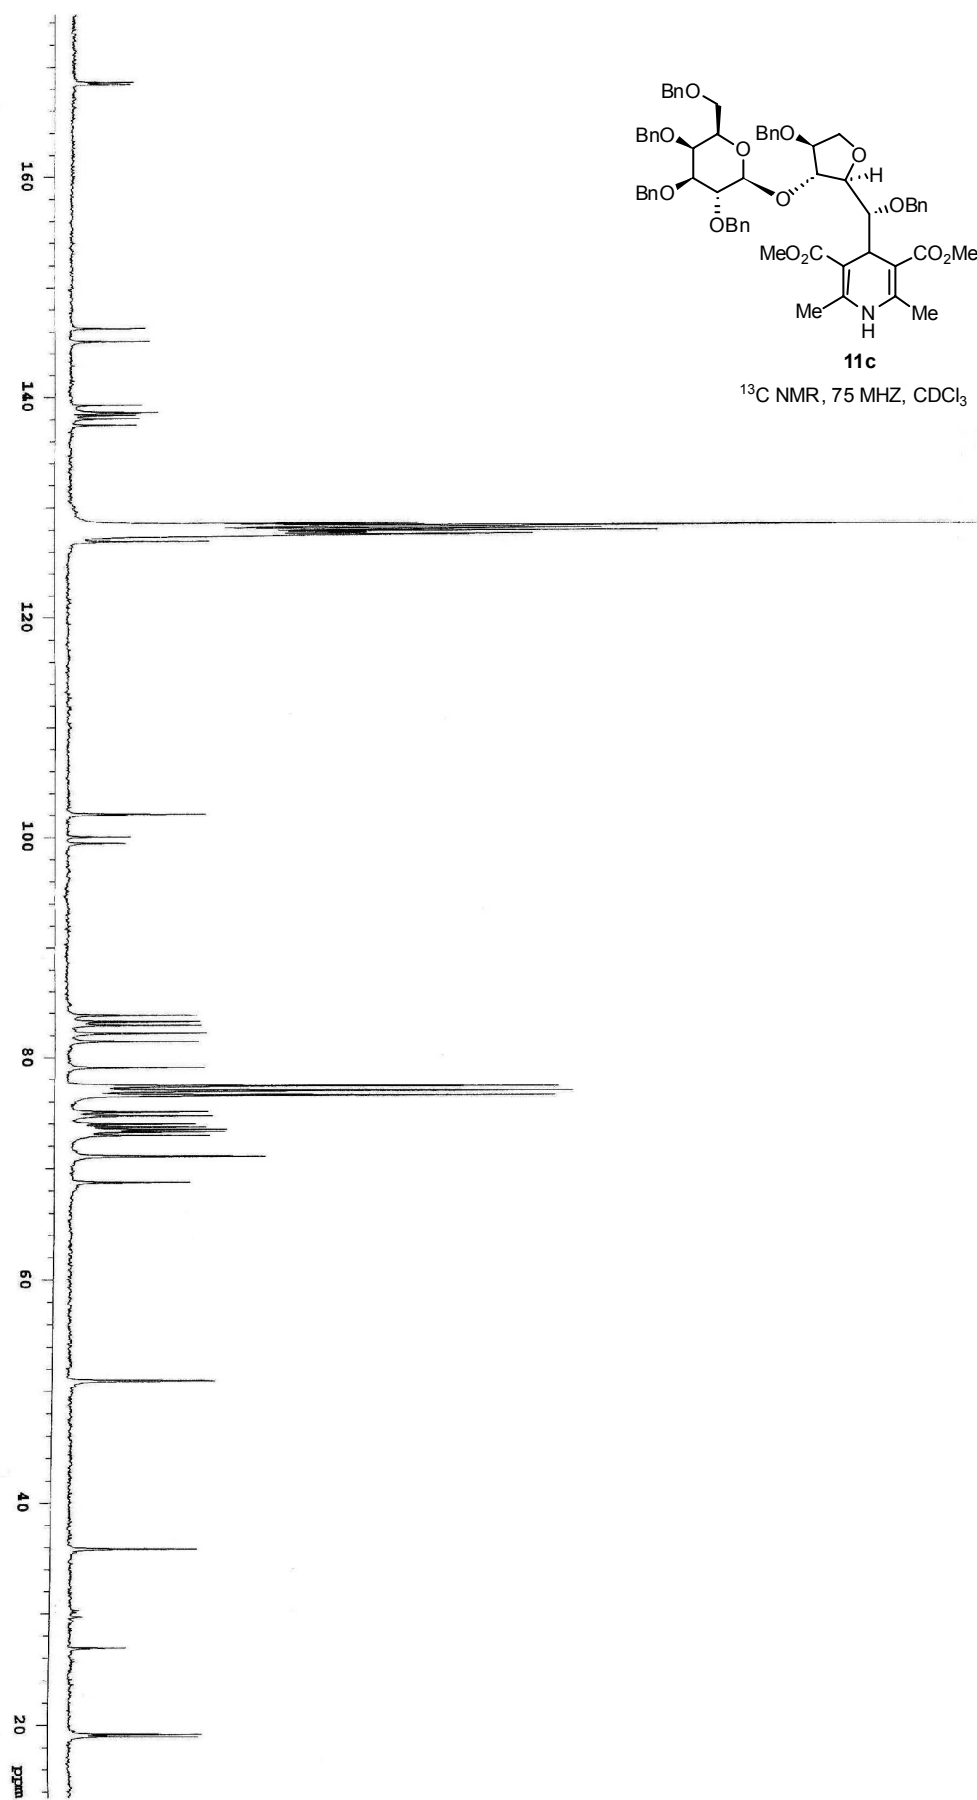



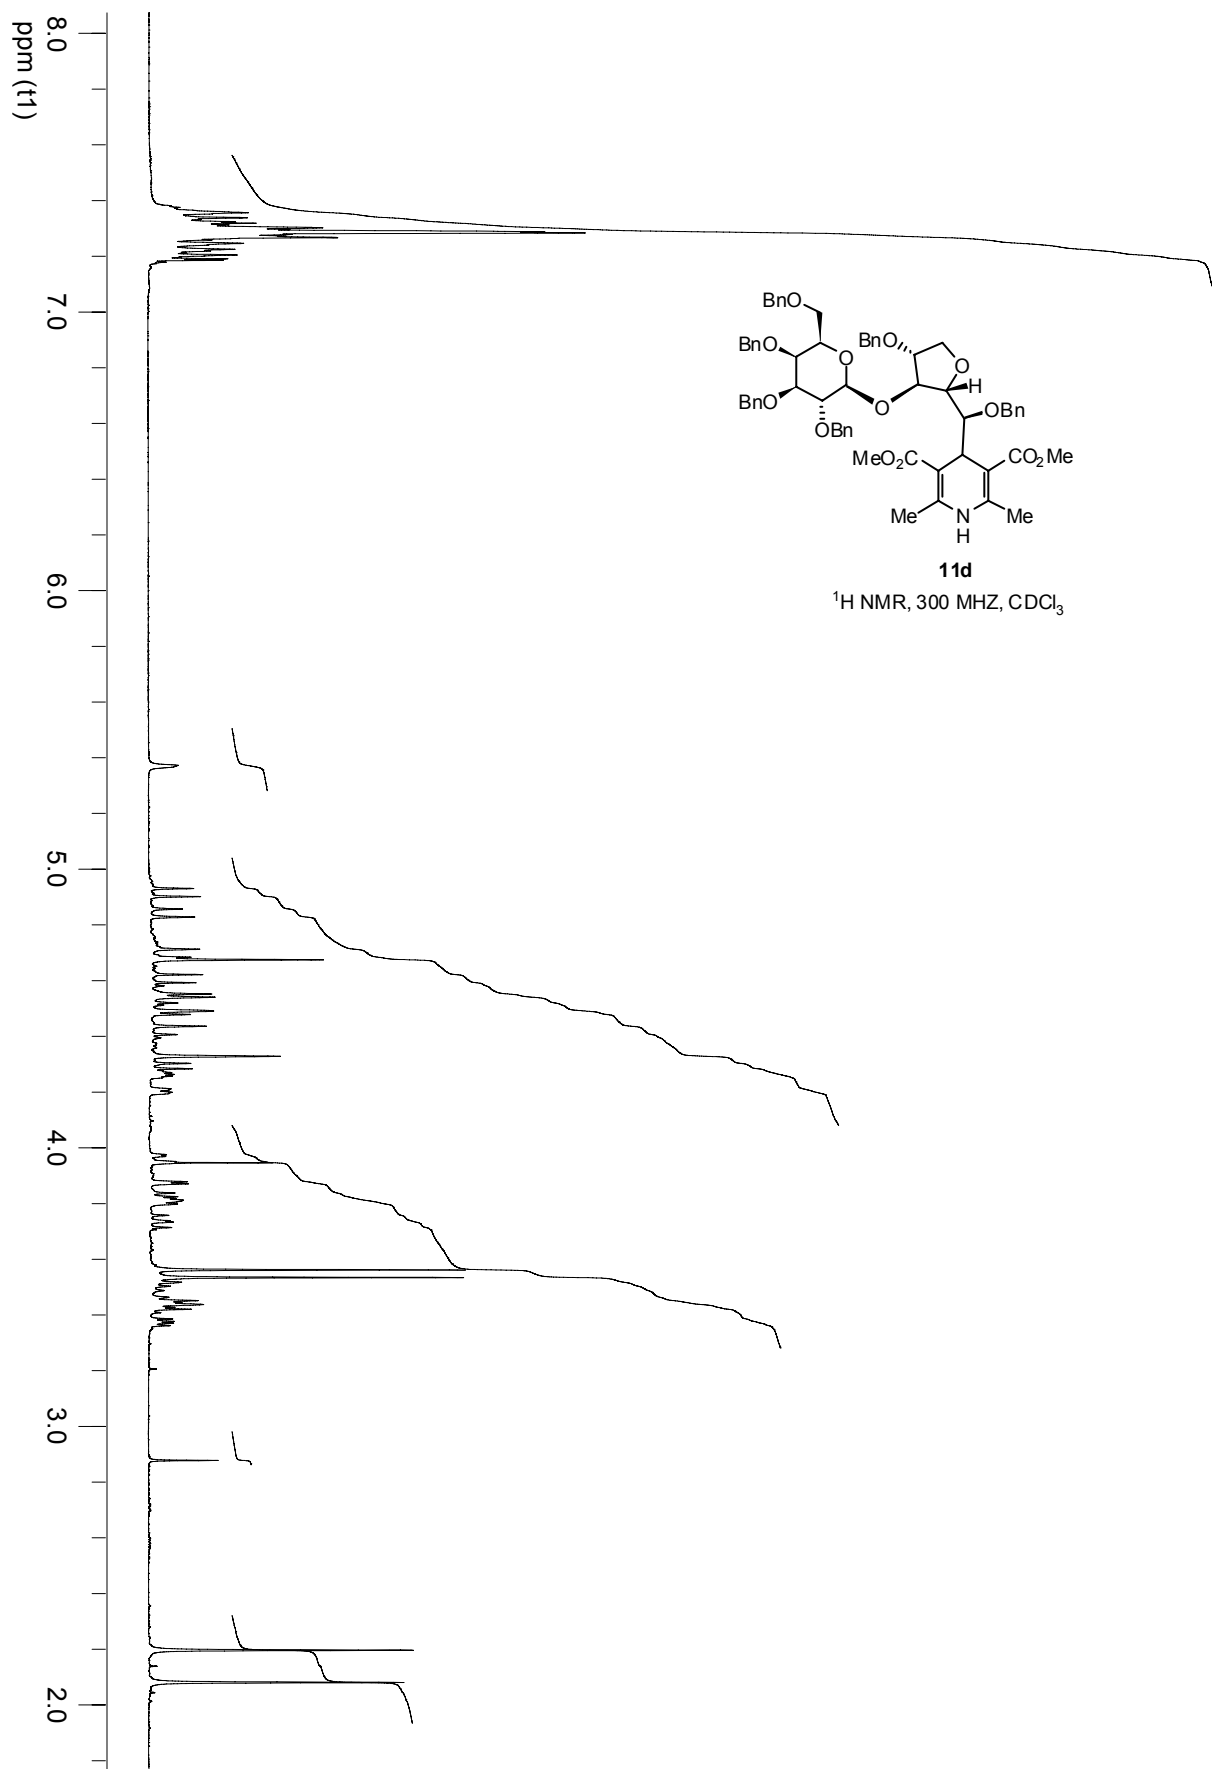

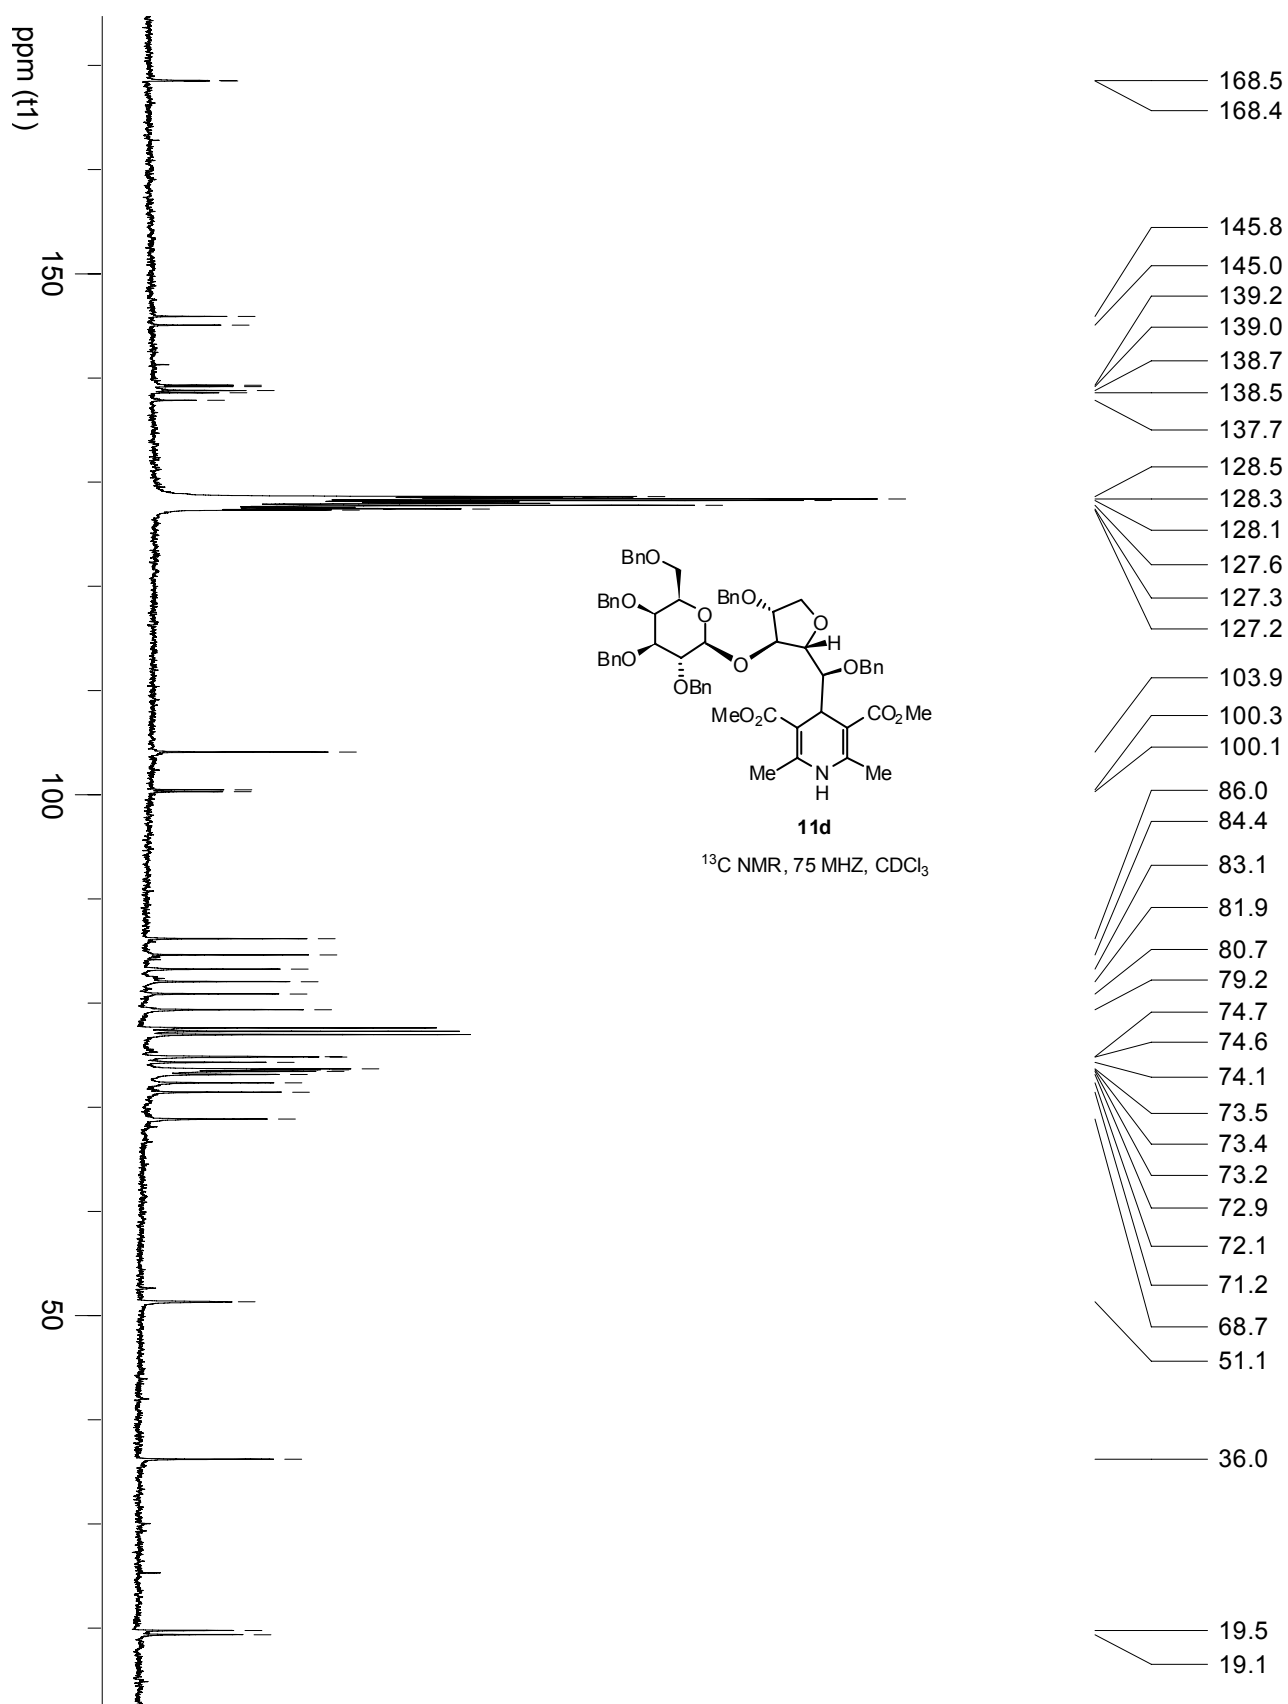

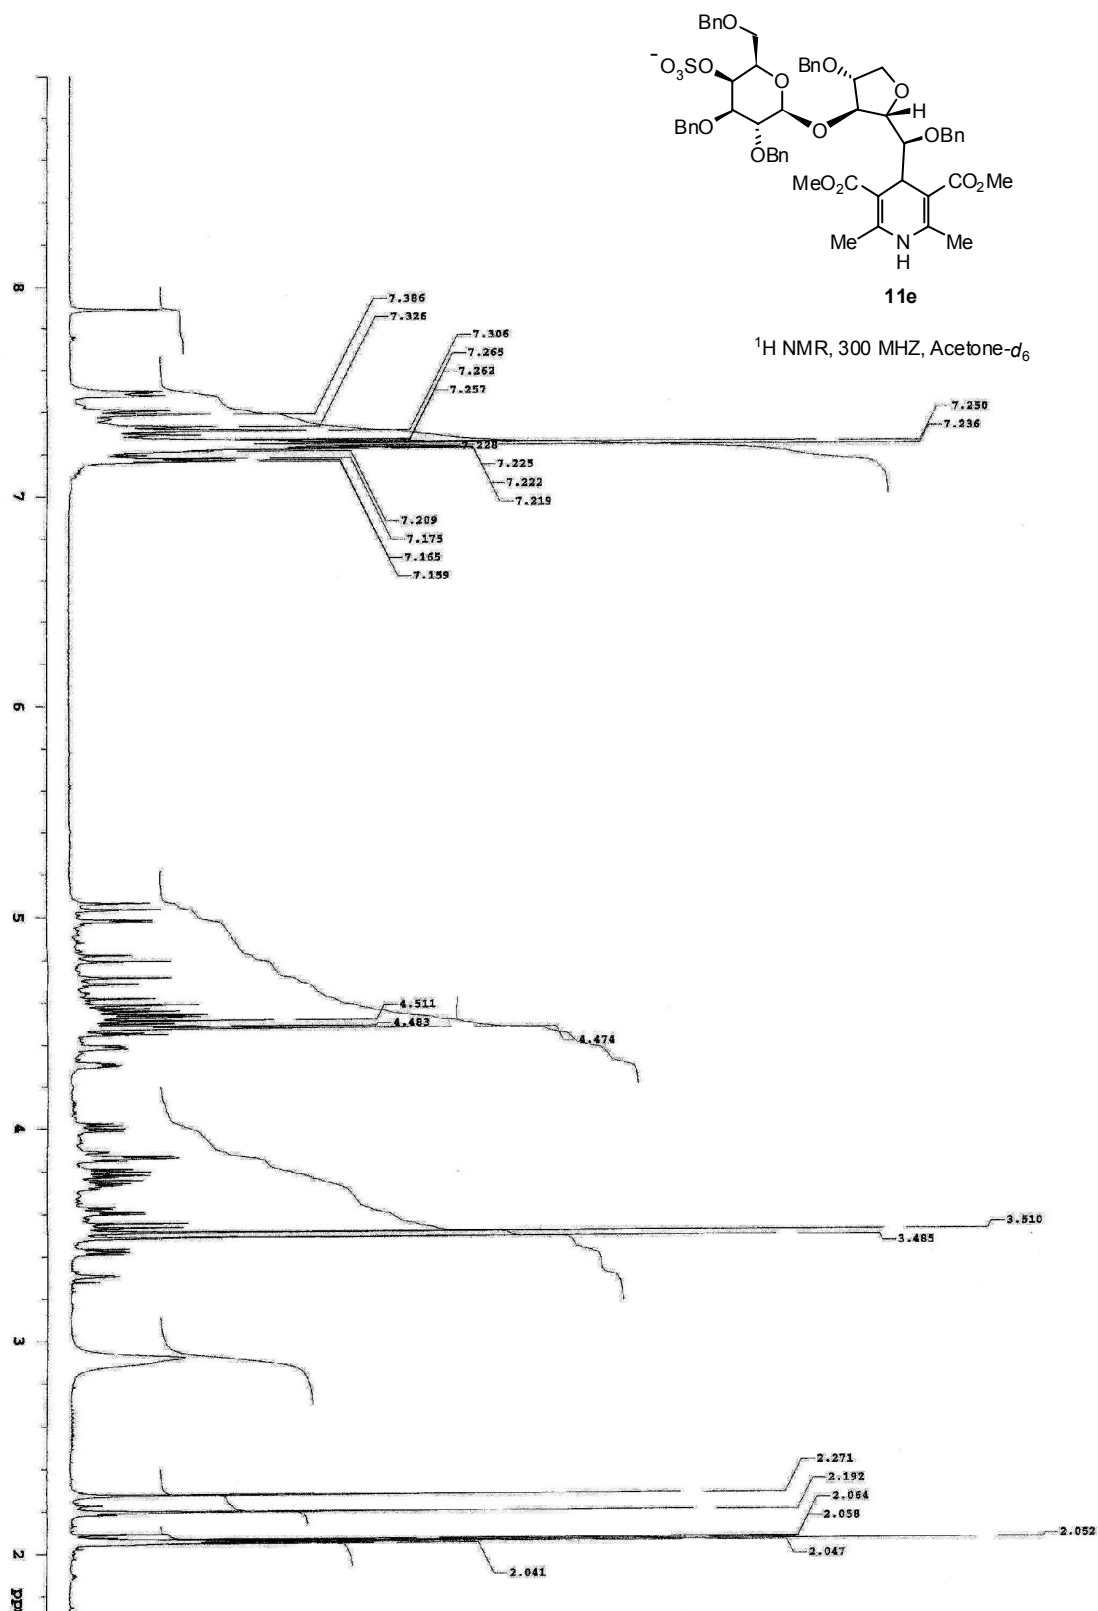

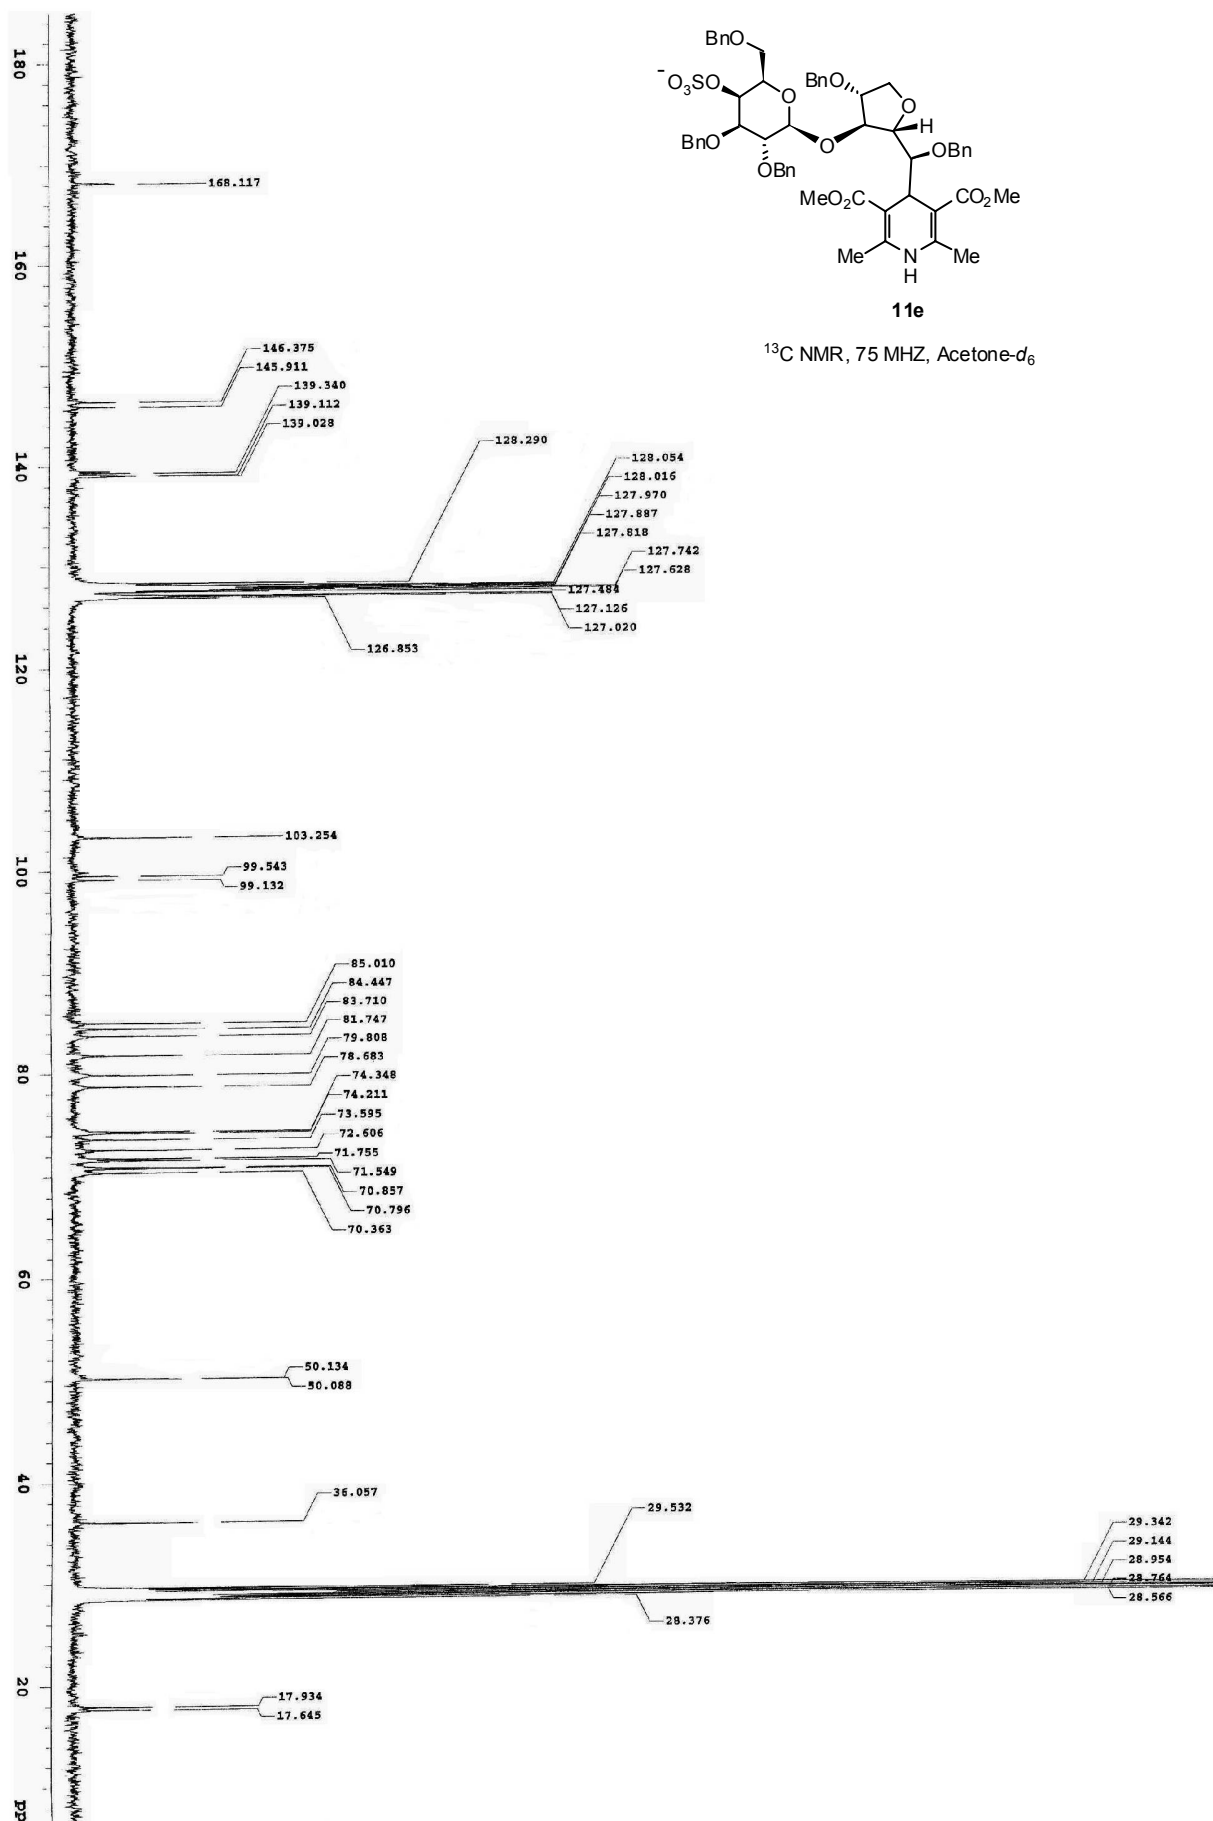

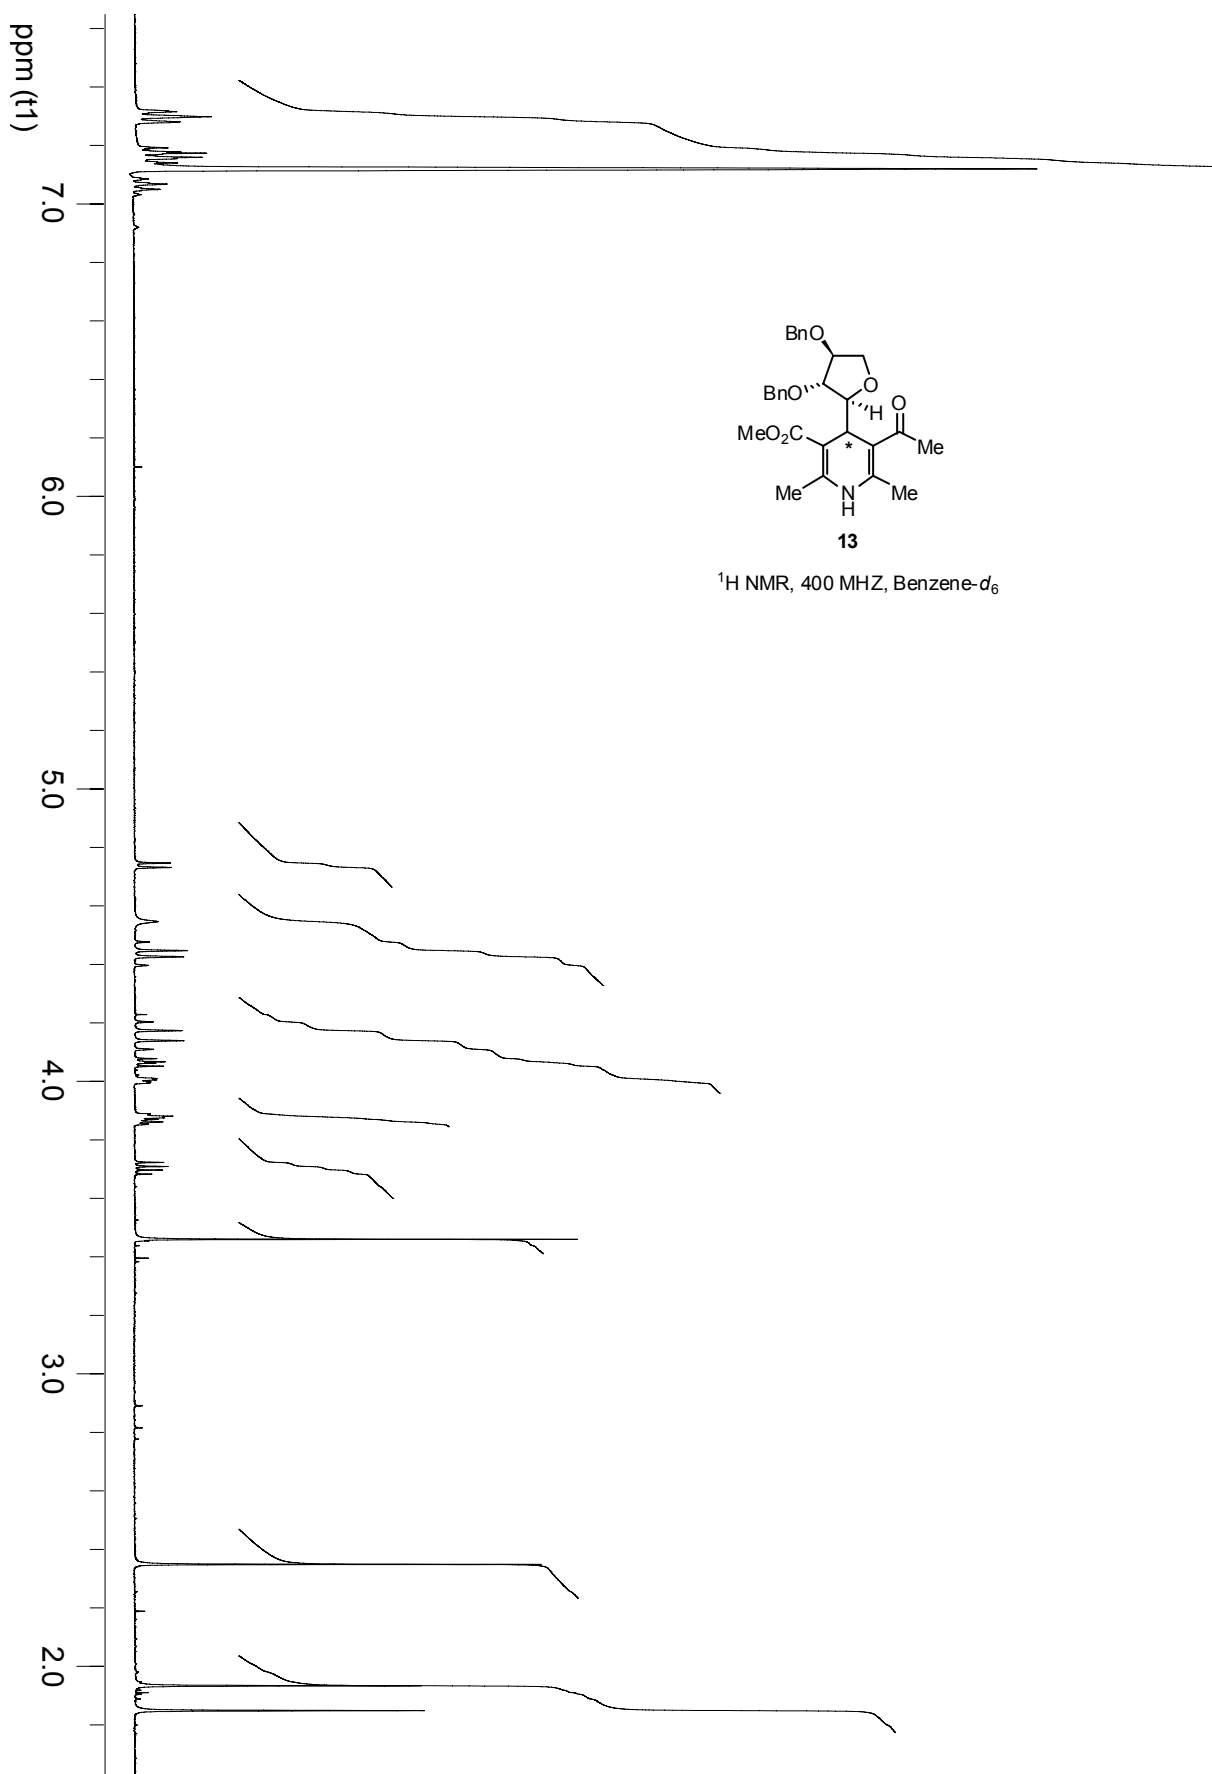

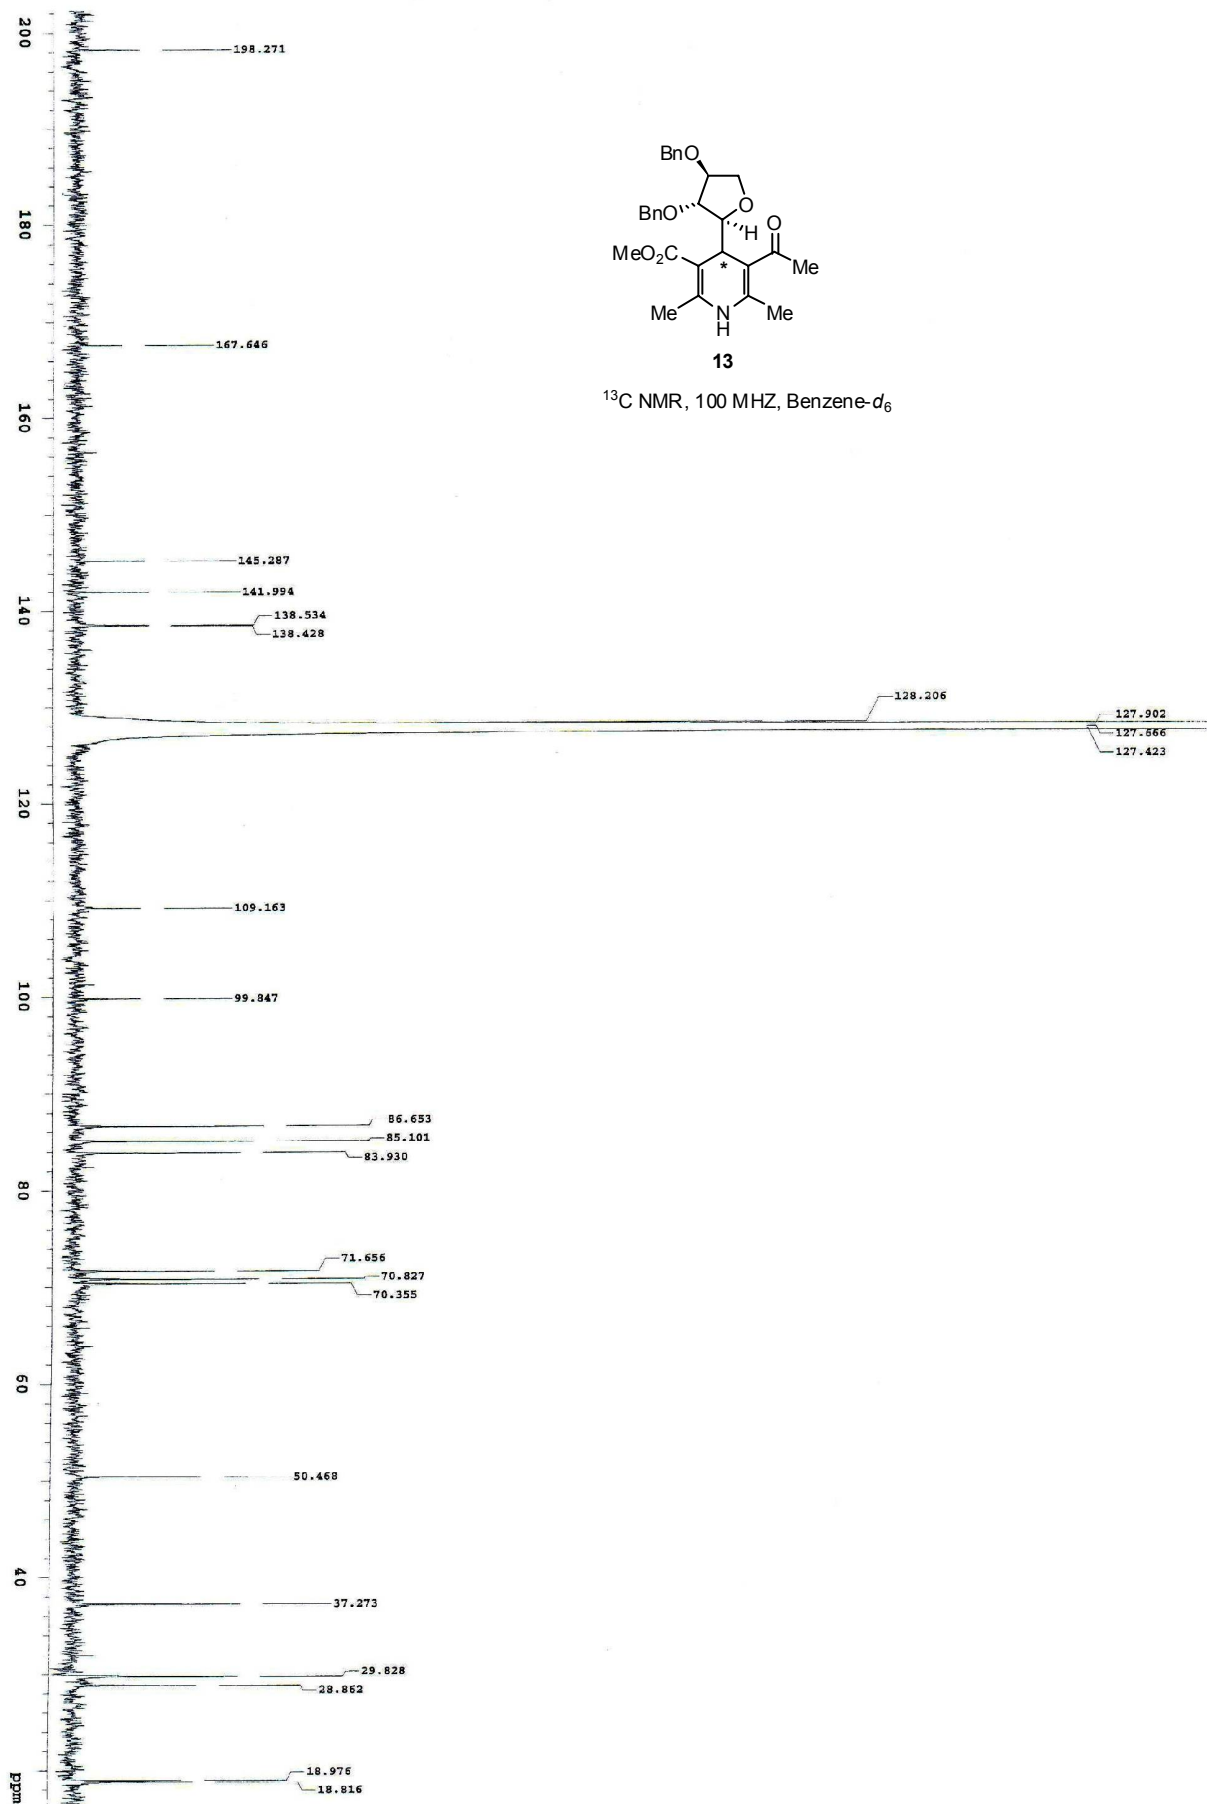

Supplement: b900422j.pdf [file b900422j.pdf]
